# Supplementary material for: Stellate ganglion blockade under ultrasound-guidance and the physiological responses in the rat
Source: Frontiers journal article supplement (doi:10.3389/fphys.2024.1505038), 2025-01-10
Supplement: Data_Sheet_1.pdf [file Data_Sheet_1.pdf]

## ***Supplementary Materials***

### **Stellate Ganglion Blockade under Ultrasound-Guidance and the Physiological Responses in the Rat**

Robert M. N. Tran<sup>1</sup>, Shaista Malik<sup>1</sup>, Christopher Reist<sup>2, 3</sup>, Chad K. Oh<sup>2</sup>,  
Najeebah Abdul-Musawir<sup>2</sup>, Stephanie C. Tjen-A-Looi<sup>1</sup>, Liang Wu Fu<sup>1</sup>, Theodore J.  
Baird<sup>2</sup>, Anh T. Nguyen<sup>1</sup>, Yiwei D. Gong<sup>1</sup>, Zhi-Ling Guo<sup>1\*</sup>

<sup>1</sup>Susan Samueli Integrative Health Institute and Department of Medicine, University of California, Irvine at Irvine, CA, USA

<sup>2</sup>AEON Biopharma, Inc., Irvine, CA, USA

<sup>3</sup>Department of Psychiatry, School of Medicine, University of California, Irvine at Irvine, CA, USA

\* Correspondence: Zhi-Ling Guo, MD, PhD  
Email: [zguo@hs.uci.edu](mailto:zguo@hs.uci.edu)

## Supplementary Tables

**Supplementary Table 1.** Respiratory rate and temperature following the intervention in the SG.

| SG Injection        | Respiratory Rate (BrPM) |         | Temperature (°C) |              |
|---------------------|-------------------------|---------|------------------|--------------|
|                     | Before                  | After   | Before           | After        |
| Right side          |                         |         |                  |              |
| Normal saline (n=6) | 45 ± 5                  | 42 ± 9  | 36.22 ± 0.32     | 36.25 ± 0.38 |
| Lidocaine (n=8)     | 54 ± 19                 | 56 ± 13 | 36.21 ± 0.34     | 36.19 ± 0.37 |
| Left side           |                         |         |                  |              |
| Normal saline (n=6) | 54 ± 5                  | 55 ± 16 | 36.52 ± 0.46     | 36.57 ± 0.46 |
| Lidocaine (n=7)     | 53 ± 15                 | 58 ± 13 | 36.44 ± 0.39     | 36.49 ± 0.38 |

Note: Data are expressed as means ± SD. Comparisons between the two groups were statistically analyzed using the Student's t-test and Mann–Whitney rank sum test. There was no significant difference in respiratory rate and temperature before and after administering 1.0-1.5% lidocaine or 0.9% normal saline on the same right or left side. Also, there was no significant difference between the right and left sides before any treatment. BrPM represents breaths per minute.

**Supplementary Table 2.** Ptosis following the intervention in the SG.

| SG Injection        | Right eye        |                       | Left eye         |                       |
|---------------------|------------------|-----------------------|------------------|-----------------------|
|                     | Grade<br>(range) | Lasting time<br>(min) | Grade<br>(range) | Lasting time<br>(min) |
| Right side          |                  |                       |                  |                       |
| Normal saline (n=6) | 0                | $0 \pm 0$             | 0                | 0                     |
| Lidocaine (n=8)     | 2 - 4            | $18 \pm 4$            | 0                | 0                     |
| Left side           |                  |                       |                  |                       |
| Normal saline (n=6) | 0                | $0 \pm 0$             | 0                | 0                     |
| Lidocaine (n=7)     | 0                | 0                     | 2 – 4            | $38 \pm 5$            |

Note: Ptosis grade is justified as the percentage of eyelid drooping: 1, 2, 3, and 4 represent 25%, 50%, 75%, and 100% of eyelid drooping, respectively. The 100% of eyelid drooping is the same as eyelid closed.
